# Supplementary material for: Development of Conformation Independent Computational Models for the Early Recognition of Breast Cancer Resistance Protein Substrates
Source: Hindawi journal article supplement (doi:10.1155/2013/863592), 2013-01-01

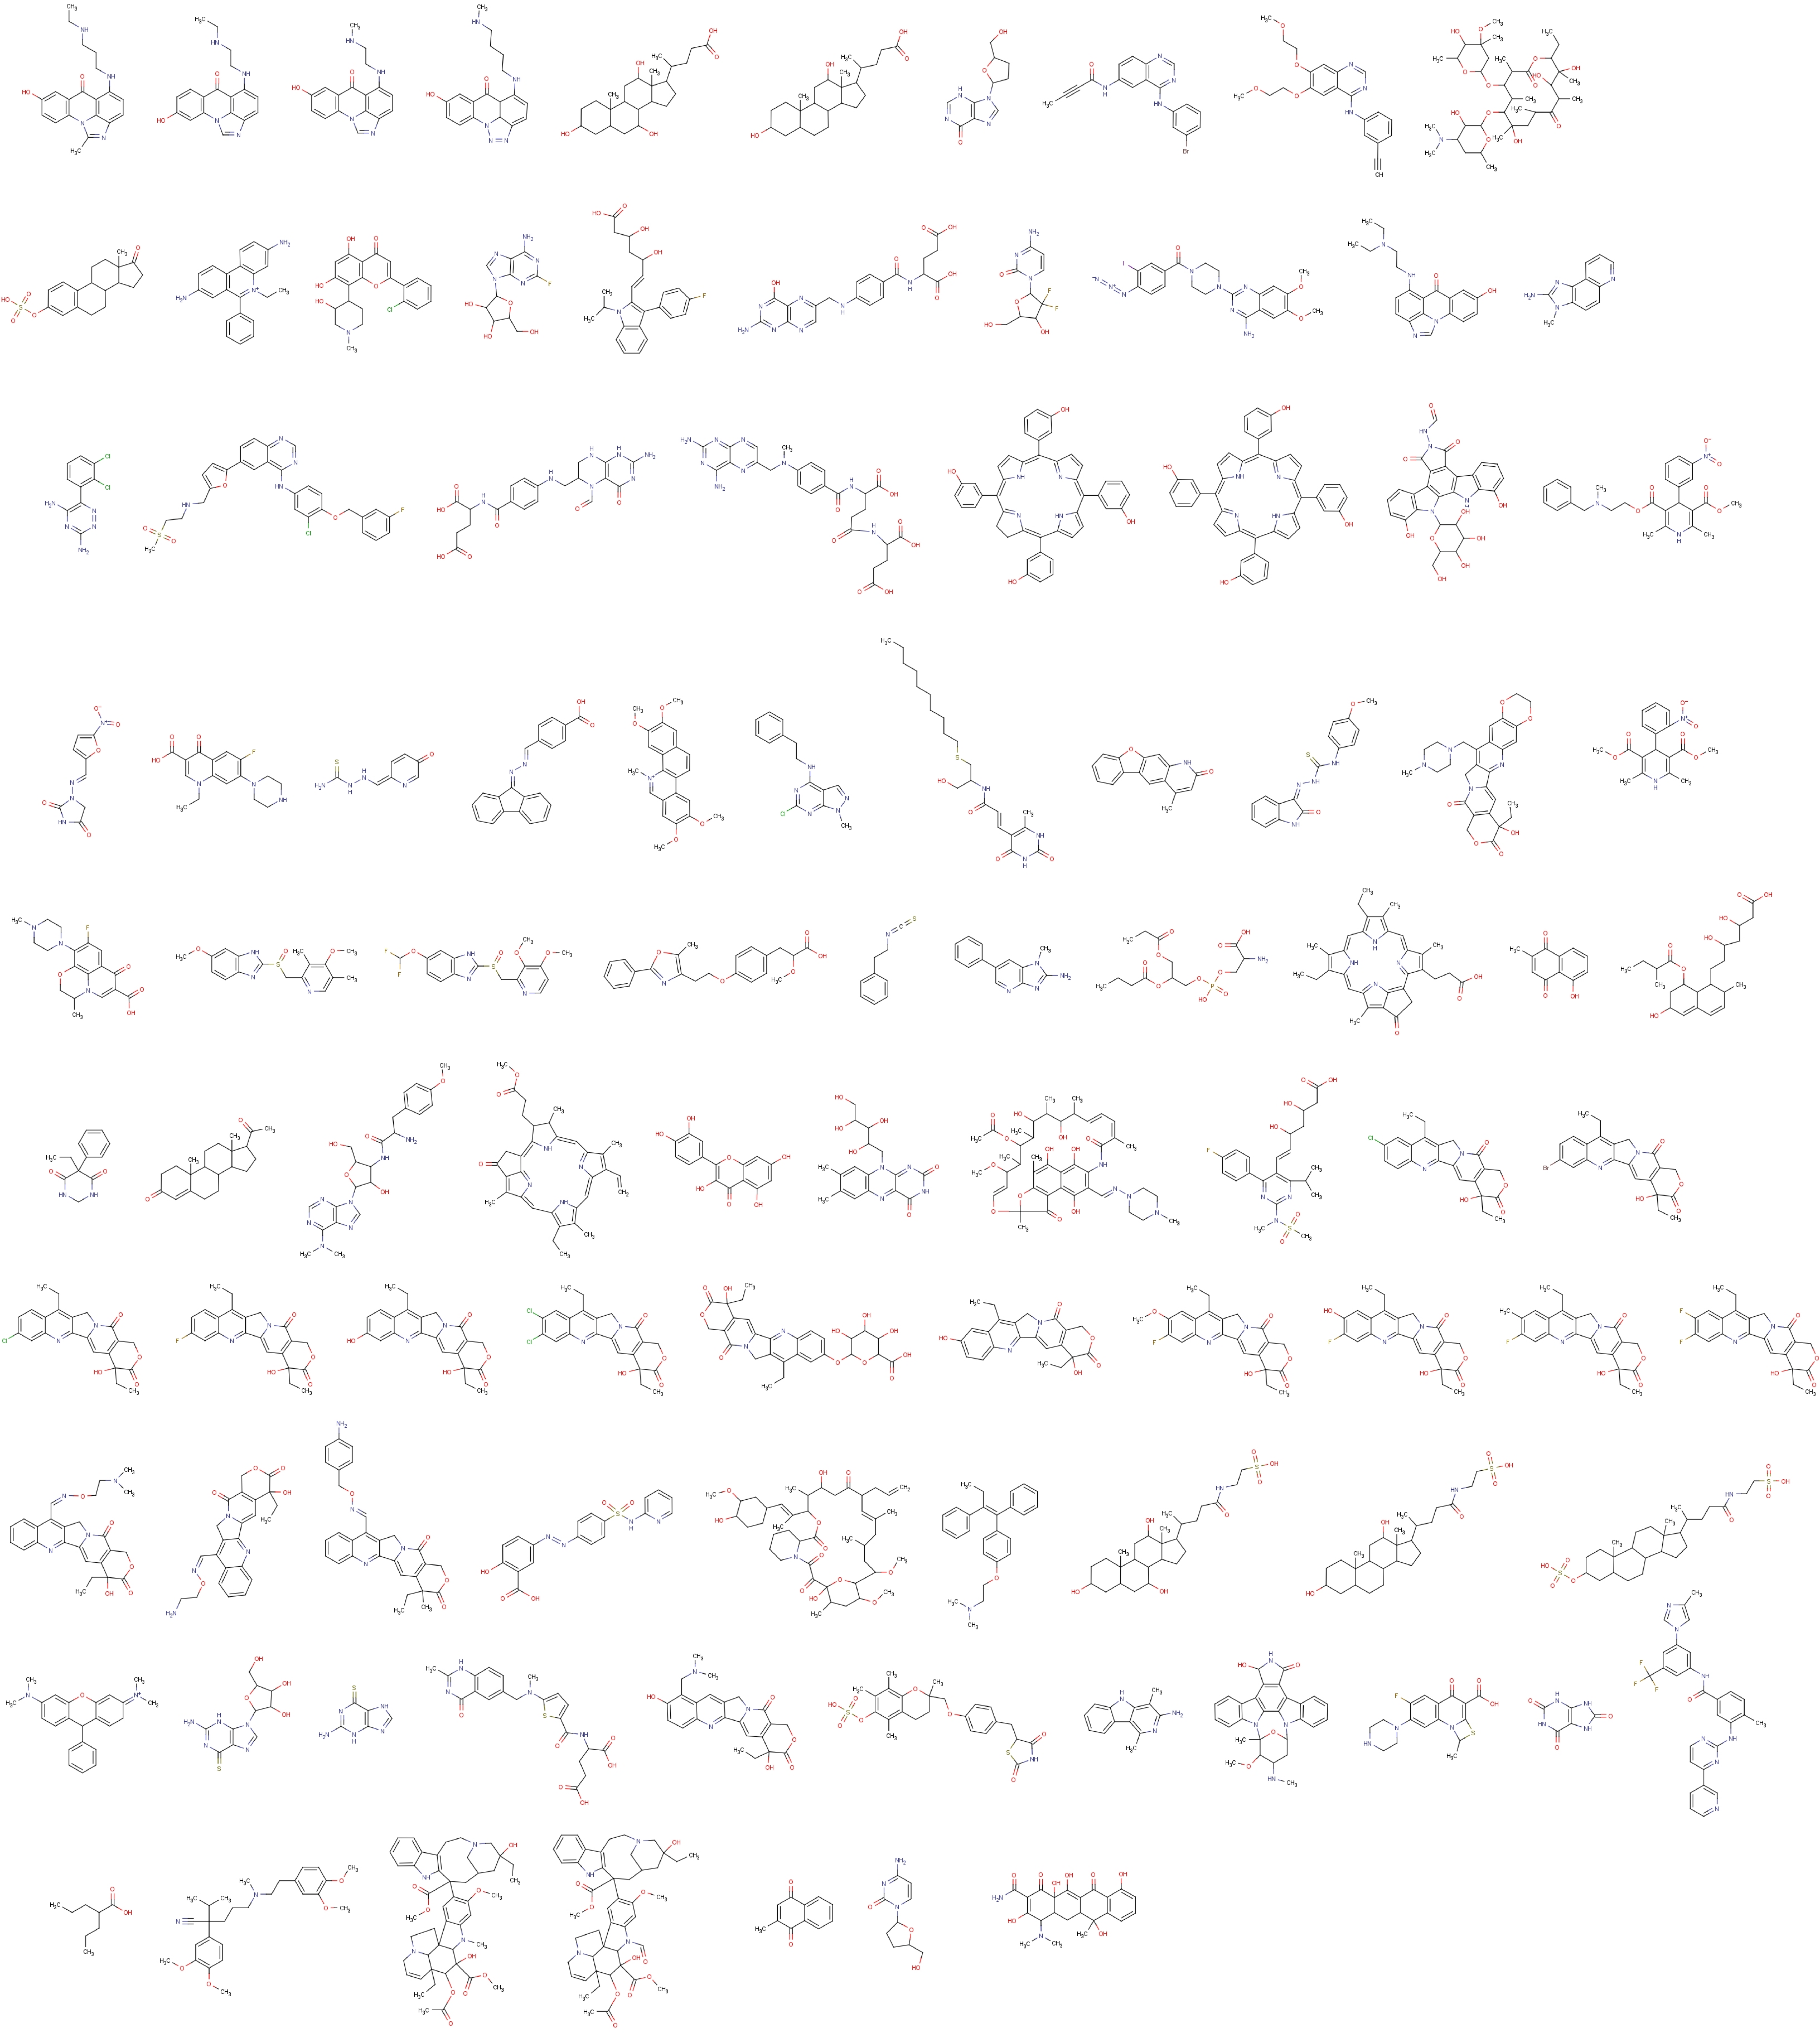

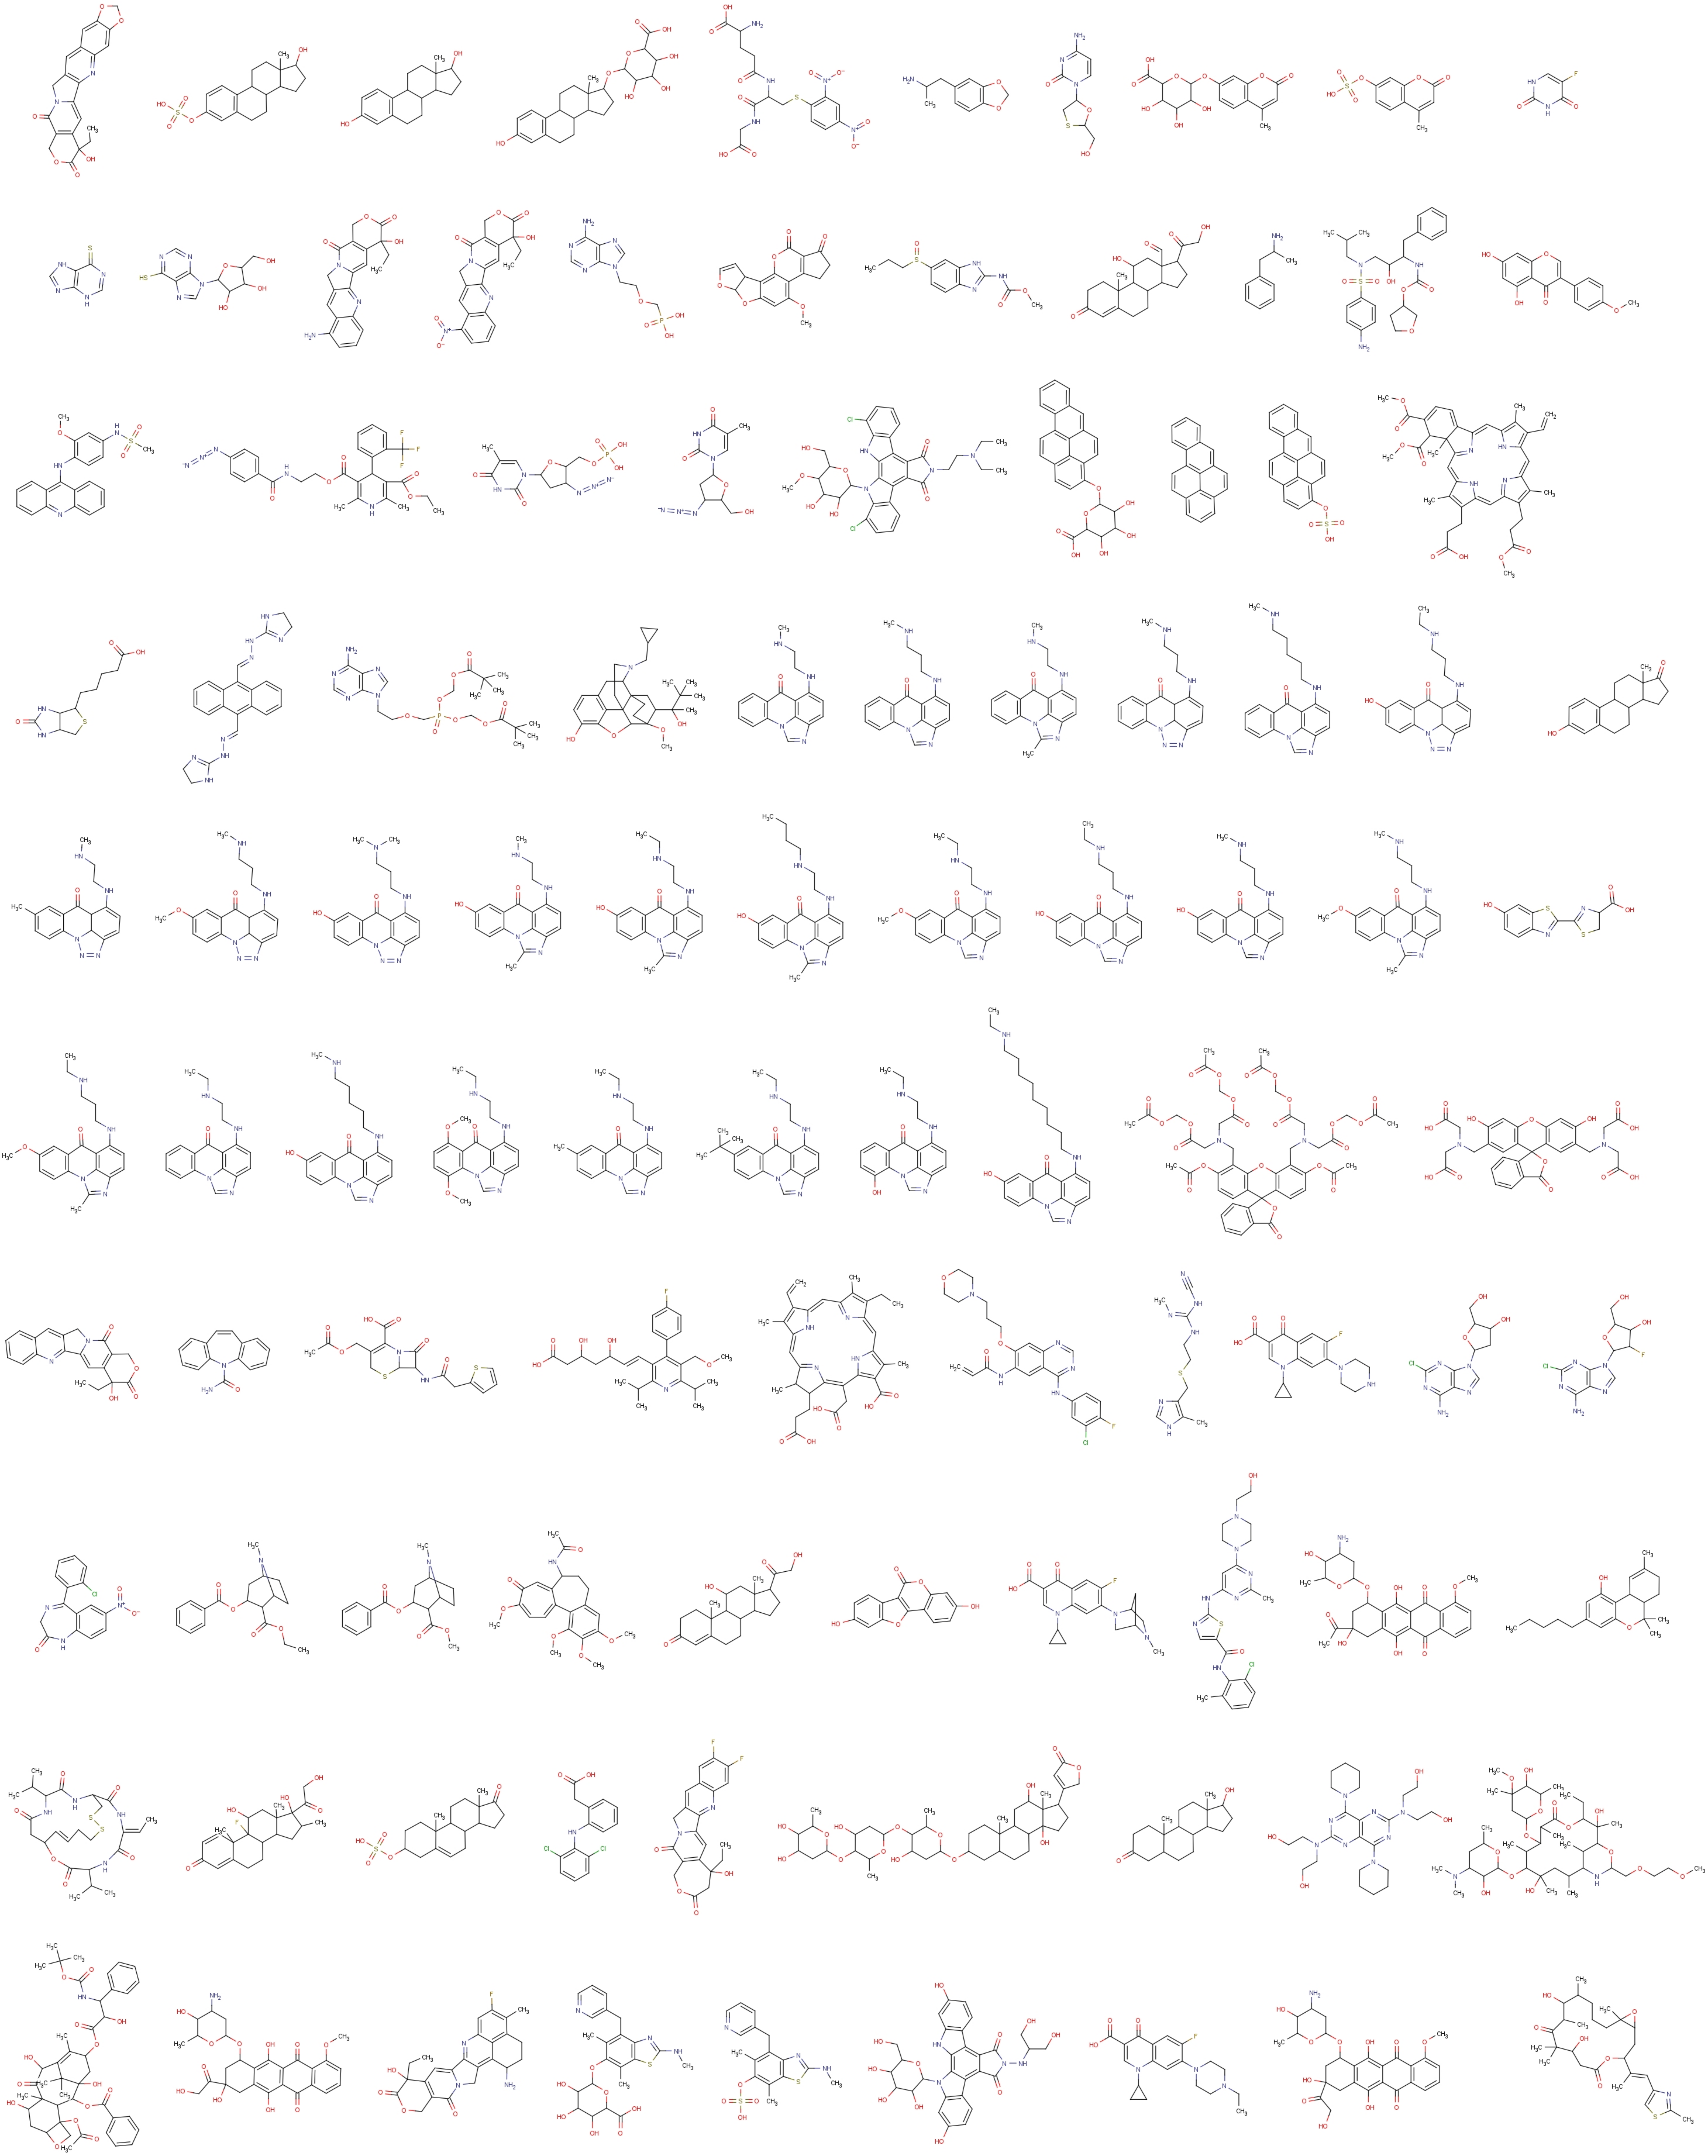

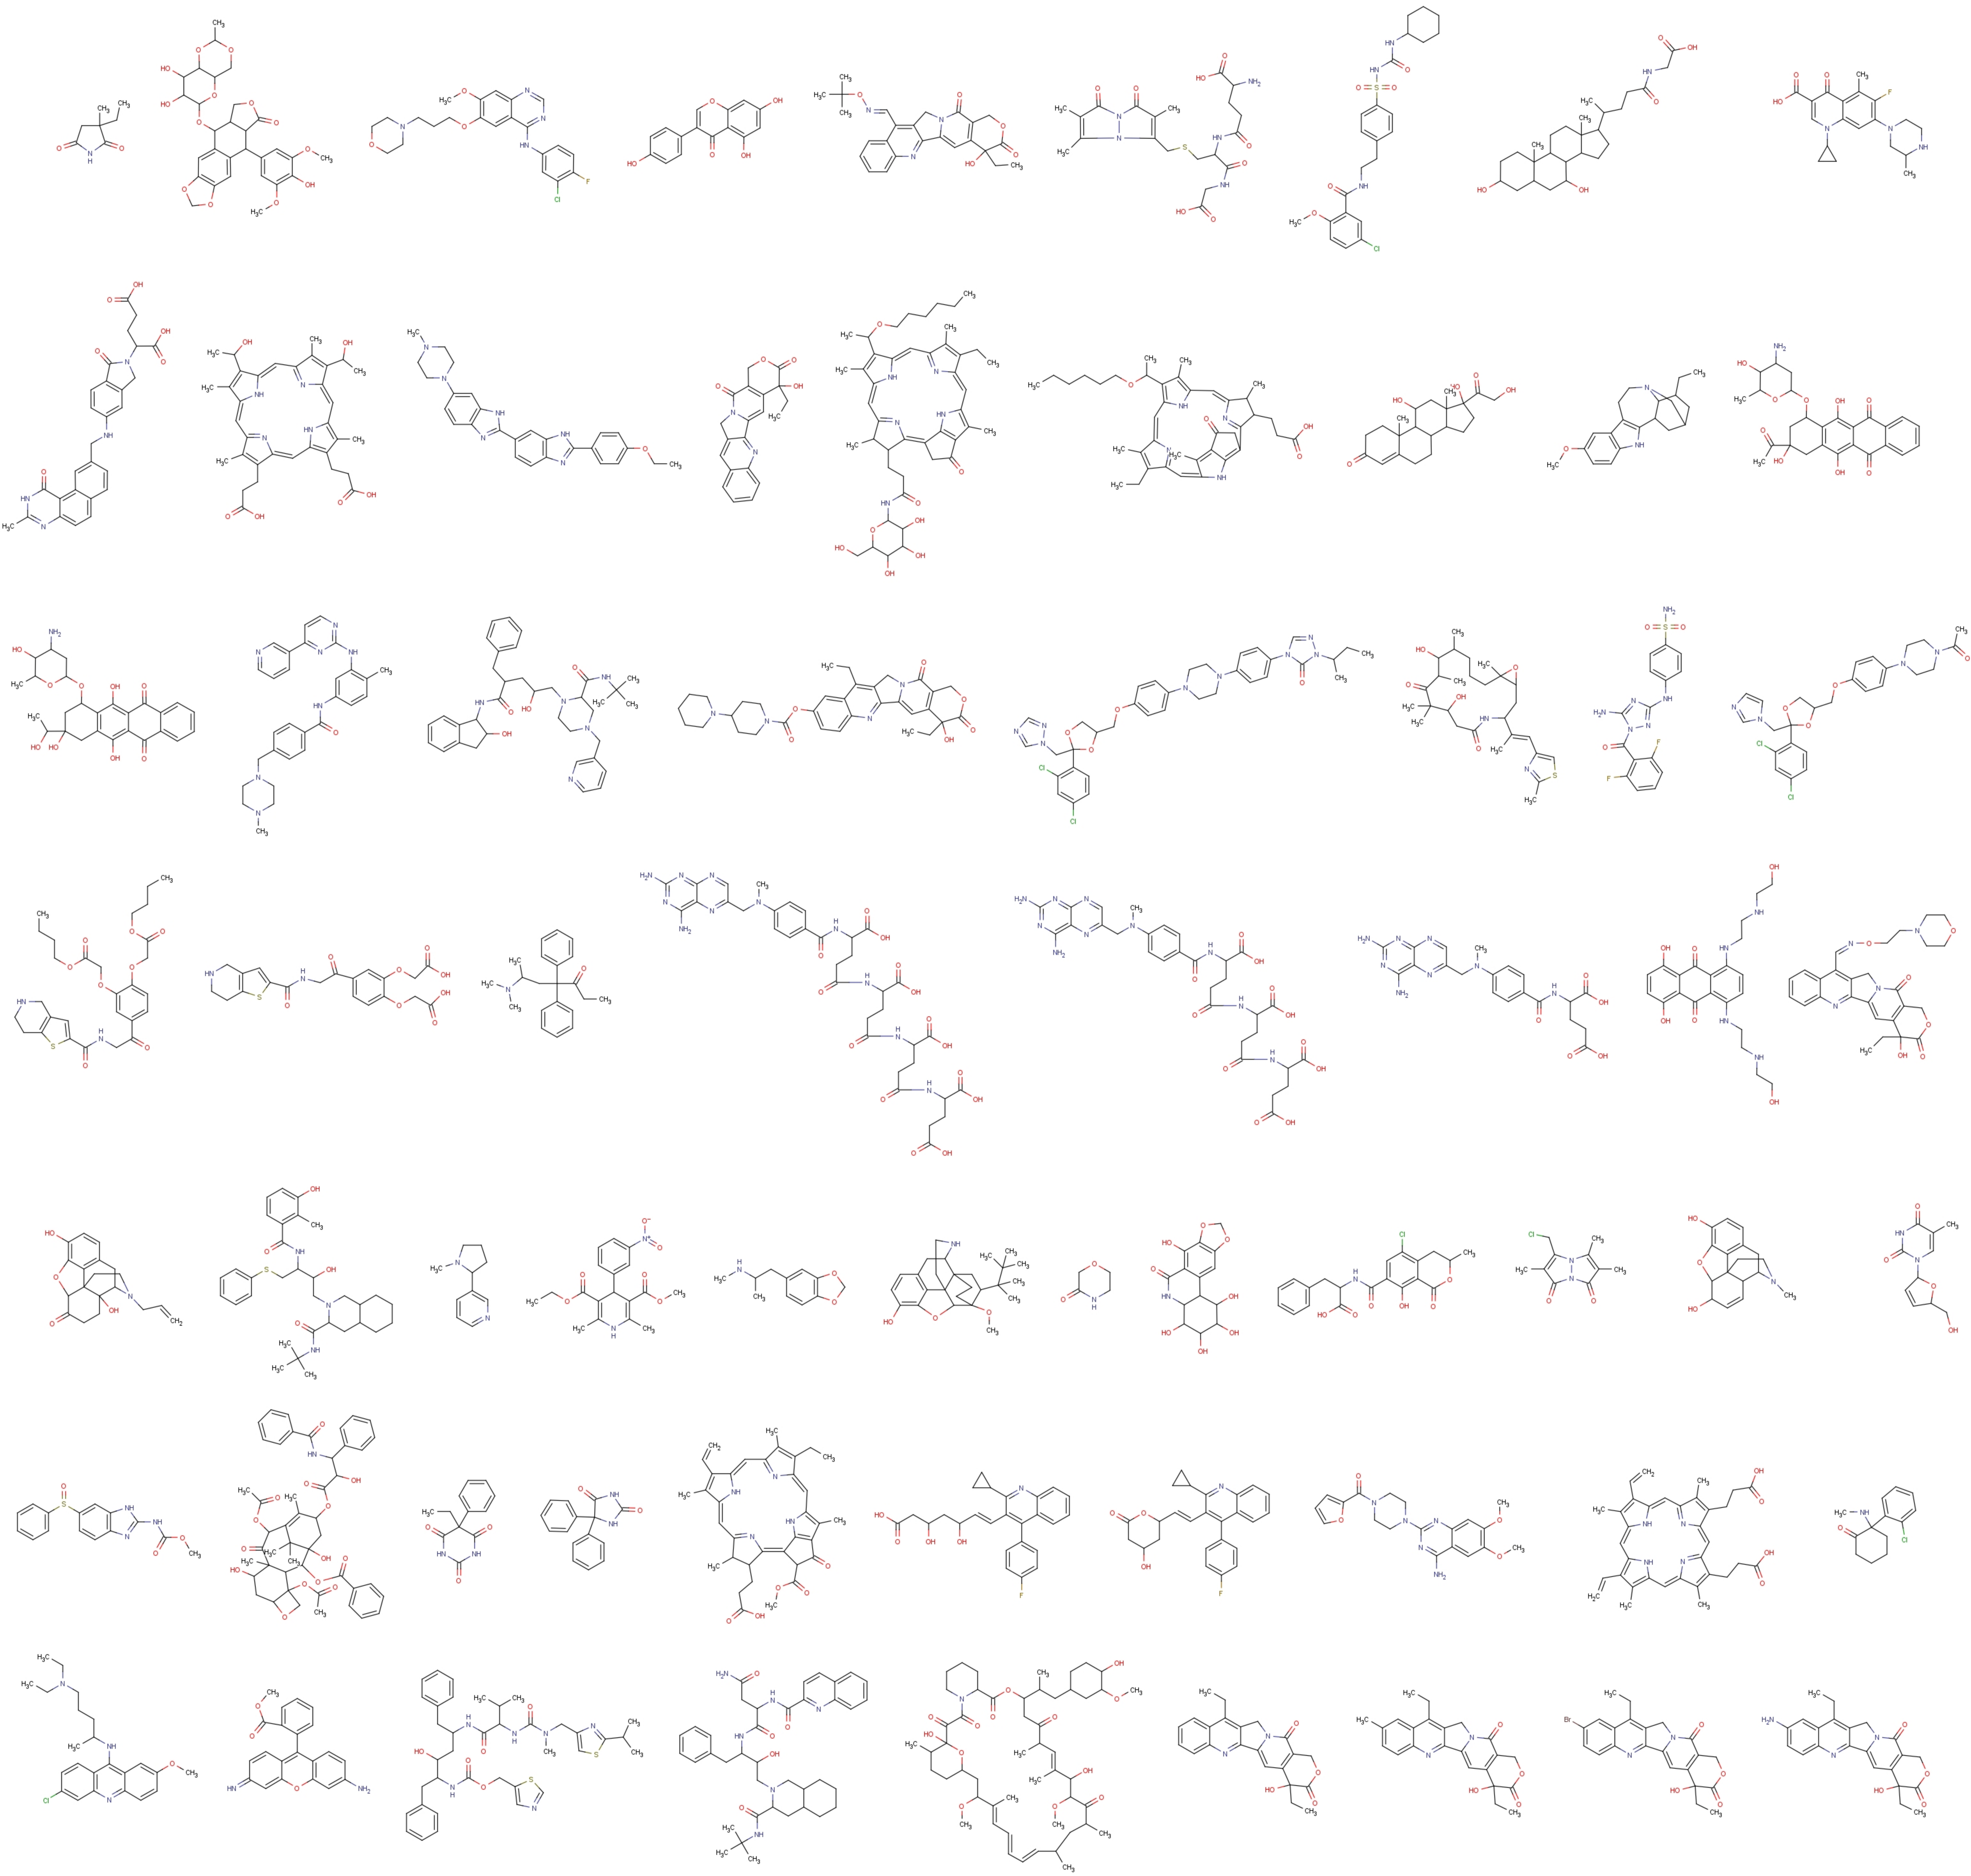

Supplement: f1 [file 863592.f1.pdf]
